# Supplementary material
Source: HighWire-hosted journal article supplement (https://srh.bmj.com/content/50/2/83)
Supplement: inline-supplementary-material-1 [file inline-supplementary-material-1.pdf]

| Country      | Potential participants (n) | participants (n) |
|--------------|----------------------------|------------------|
| Argentina    | 845                        | 533              |
| Australia    | 561                        | 318              |
| Botswana     | 344                        | 211              |
| Canada       | 163                        | 103              |
| China        | 827                        | 0                |
| Colombia     | 2452                       | 1168             |
| Czech        | 1862                       | 533              |
| Denmark      | 1001                       | 186              |
| France       | 1593                       | 1152             |
| Germany      | 612                        | 471              |
| Italy        | 329                        | 173              |
| Kenya        | 243                        | 0                |
| Latvia       | 1176                       | 695              |
| Luxembourg   | 568                        | 201              |
| Malaysia     | 499                        | 133              |
| Mexico       | 1673                       | 841              |
| Moldova      | 244                        | 114              |
| Nigeria      | 231                        | 13               |
| Panama       | 960                        | 395              |
| Portugal     | 3323                       | 2209             |
| Singapore    | 566                        | 111              |
| Spain        | 295                        | 24               |
| Sweden       | 1307                       | 473              |
| Uganda       | 212                        | 60               |
| Uruguay      | 696                        | 385              |
| USA          | 305                        | 170              |
| Egypt        | 31                         | 0                |
| Lebanon      | 54                         | 0                |
| Mozambique   | 66                         | 0                |
| South Africa | 29                         | 0                |
| Total        | 23067                      | 10672            |
