# Supplementary material
Source: HighWire-hosted journal article supplement (https://srh.bmj.com/content/50/2/83)
Supplement: inline-supplementary-material-2 [file inline-supplementary-material-2.pdf]

Supplementary table 2 Comparison of characteristics between participants in this study (n=10672) and all reproductive-aged women from the I-SHARE survey (n=13562)

| Characteristics                    | Participants |       | All reproductive-aged women |       | P value |
|------------------------------------|--------------|-------|-----------------------------|-------|---------|
|                                    | n=10672      | col % | n=13562                     | col % |         |
| <b>Age</b>                         |              |       |                             |       |         |
| Mean (SD)                          | 29.9 (7.8)   |       | 30.3 (8.0)                  |       | <0.001  |
| <b>Marital status</b>              |              |       |                             |       |         |
| Single, no partner                 | 2918         | 27.4  | 3697                        | 27.3  | <0.001  |
| Not married, have a partner        | 5030         | 47.2  | 5849                        | 43.3  |         |
| Legally Married                    | 2467         | 23.2  | 3650                        | 27.0  |         |
| Widowed/divorced/other             | 239          | 2.2   | 327                         | 2.4   |         |
| <b>Education</b>                   |              |       |                             |       |         |
| No formal education                | 20           | 0.2   | 39                          | 0.3   | >0.05   |
| Some/completed primary education   | 599          | 5.8   | 675                         | 5.2   |         |
| Some/completed secondary education | 1850         | 17.9  | 2408                        | 18.3  |         |
| Some college/university            | 1662         | 16.0  | 2107                        | 16.1  |         |
| Completed college/university       | 6217         | 60.1  | 7884                        | 60.1  |         |
| <b>Religion</b>                    |              |       |                             |       |         |
| Has no religious belief            | 4211         | 48.0  | 5144                        | 45.8  | p<0.01  |
| Has a religious belief             | 4558         | 52.0  | 6082                        | 54.2  |         |
| <b>Number of children</b>          |              |       |                             |       |         |
| 0                                  | 7779         | 72.9  | 9273                        | 68.4  | <0.001  |
| 1                                  | 1294         | 12.1  | 1988                        | 14.6  |         |
| >=2                                | 1597         | 15.0  | 2299                        | 17.0  |         |
