# Supplementary material
Source: HighWire-hosted journal article supplement (https://srh.bmj.com/content/50/2/83)
Supplement: inline-supplementary-material-5 [file inline-supplementary-material-5.pdf]

Supplementary table 5 The multinomial probit regression analysis of pandemic-induced exposures on fertility intentions compared with not changed, using bootstrap estimation (n=10672)

|                                                                          | Fertility intentions      |                             |
|--------------------------------------------------------------------------|---------------------------|-----------------------------|
|                                                                          | Postponed<br>AOR (95% CI) | Accelerated<br>AOR (95% CI) |
| <b>Age (years)</b>                                                       | 1.53 (1.31 to 1.80) ***   | 1.34 (1.17 to 1.54) ***     |
| <b>Age<sup>2</sup> (years)</b>                                           | 0.99 (0.99 to 1.00) ***   | 1.00 (0.99 to 1.00) ***     |
| <b>Marital status</b>                                                    |                           |                             |
| Single <sup>†</sup>                                                      | 1                         | 1                           |
| Not married, have a partner                                              | 0.94 (0.70 to 1.27)       | 1.03 (0.73 to 1.44)         |
| Legally Married                                                          | 1.27 (0.95 to 1.70)       | 0.98 (0.68 to 1.43)         |
| <b>Education</b>                                                         |                           |                             |
| No formal education-secondary education                                  | 1                         | 1                           |
| Some college/university                                                  | 1.17 (0.79 to 1.72)       | 1.11 (0.59 to 2.11)         |
| Completed college/university                                             | 1.08 (0.83 to 1.39)       | 1.26 (0.82 to 1.92)         |
| <b>Religion</b>                                                          |                           |                             |
| Has no religious belief                                                  | 1                         | 1                           |
| Has a religious belief                                                   | 1.38 (1.14 to 1.66) ***   | 1.53 (1.14 to 2.06) **      |
| <b>Number of children</b>                                                |                           |                             |
| 0                                                                        | 1                         | 1                           |
| 1                                                                        | 1.25 (0.85 to 1.82)       | 0.75 (0.55 to 1.00)         |
| >=2                                                                      | 0.67 (0.54 to 0.84) ***   | 0.39 (0.28 to 0.55) ***     |
| <b>Testing for COVID-19</b>                                              |                           |                             |
| No                                                                       | 1                         | 1                           |
| Yes, always negative                                                     | 0.79 (0.63 to 0.99) *     | 1.11 (0.90 to 1.37)         |
| Yes, at least positive once                                              | 1.05 (0.44 to 2.48)       | 1.45 (0.69 to 3.06)         |
| <b>Isolation/quarantine</b>                                              |                           |                             |
| No                                                                       | 1                         | 1                           |
| Yes                                                                      | 1.41 (1.15 to 1.72) ***   | 1.20 (0.99 to 1.46)         |
| <b>Personal income loss</b>                                              |                           |                             |
| No                                                                       | 1                         | 1                           |
| Yes                                                                      | 1.29 (1.11 to 1.51) **    | 1.22 (1.05 to 1.41) **      |
| <b>Living together with a steady partner</b>                             |                           |                             |
| No, s/he stay elsewhere                                                  | 1                         | 1                           |
| Yes, the whole time/part of the time                                     | 1.20 (0.85 to 1.68)       | 1.57 (1.08 to 2.28) *       |
| <b>Mental health compared with three months before COVID-19 measures</b> |                           |                             |
| <b>Frequency of getting angry</b>                                        |                           |                             |
| Same or less                                                             | 1                         | 1                           |
| More                                                                     | 1.30 (1.17 to 1.44) ***   | 0.98 (0.87 to 1.09)         |
| <b>Frequency of feeling frustrated</b>                                   |                           |                             |
| Same or less                                                             | 1                         | 1                           |
| More                                                                     | 1.21 (1.02 to 1.44) *     | 0.99 (0.82 to 1.20)         |
| <b>Frequency of feeling bored</b>                                        |                           |                             |
| Same or less                                                             | 1                         | 1                           |

|                                             |                         |                     |
|---------------------------------------------|-------------------------|---------------------|
| More                                        | 1.09 (0.98 to 1.21)     | 1.10 (0.82 to 1.48) |
| <b>Frequency of worrying about finances</b> |                         |                     |
| Same or less                                | 1                       | 1                   |
| More                                        | 1.43 (1.17 to 1.75) *** | 1.20 (0.97 to 1.49) |

<sup>†</sup>Single: including, no partner, widowed, divorced, other.

AOR: Adjusted odd ratios. 95% confidence intervals in brackets

\* p < 0.05, \*\* p < 0.01, \*\*\* p < 0.001.
