# Supplementary material
Source: HighWire-hosted journal article supplement (https://srh.bmj.com/content/50/2/83)
Supplement: inline-supplementary-material-6 [file inline-supplementary-material-6.pdf]

Supplementary table 6 The multinomial probit regression analysis of pandemic-induced exposures on fertility intentions compared with not changed, removing Nigeria, Spain, and Uganda samples (n=10575)

|                                                                          | Fertility intentions      |                             |
|--------------------------------------------------------------------------|---------------------------|-----------------------------|
|                                                                          | Postponed<br>AOR (95% CI) | Accelerated<br>AOR (95% CI) |
| <b>Age (years)</b>                                                       | 1.54 (1.31 to 1.81) ***   | 1.34 (1.18 to 1.53) ***     |
| <b>Age<sup>2</sup> (years)</b>                                           | 0.99 (0.99 to 1.00) ***   | 1.00 (0.99 to 1.00) ***     |
| <b>Marital status</b>                                                    |                           |                             |
| Single <sup>†</sup>                                                      | 1                         | 1                           |
| Not married to have a partner                                            | 0.96 (0.72 to 1.26)       | 1.03 (0.74 to 1.42)         |
| Legally Married                                                          | 1.29 (0.96 to 1.72)       | 0.97 (0.68 to 1.39)         |
| <b>Education</b>                                                         |                           |                             |
| No formal education-secondary education                                  | 1                         | 1                           |
| Some college/university                                                  | 1.16 (0.81 to 1.67)       | 1.11 (0.61 to 2.01)         |
| Completed college/university                                             | 1.08 (0.88 to 1.32)       | 1.26 (0.84 to 1.88)         |
| <b>Religion</b>                                                          |                           |                             |
| Has no religious belief                                                  | 1                         | 1                           |
| Has a religious belief                                                   | 1.38 (1.16 to 1.63) ***   | 1.53 (1.16 to 2.01) **      |
| <b>Number of children</b>                                                |                           |                             |
| 0                                                                        | 1                         | 1                           |
| 1                                                                        | 1.25 (0.86 to 1.80)       | 0.74 (0.55 to 0.99) *       |
| >=2                                                                      | 0.67 (0.53 to 0.85) ***   | 0.40 (0.30 to 0.53) ***     |
| <b>Testing for COVID-19</b>                                              |                           |                             |
| No                                                                       | 1                         | 1                           |
| Yes, always negative                                                     | 0.79 (0.64 to 0.97) *     | 1.12 (0.93 to 1.35)         |
| Yes, at least positive once                                              | 1.05 (0.47 to 2.35)       | 1.48 (0.76 to 2.88)         |
| <b>Isolation/quarantine</b>                                              |                           |                             |
| No                                                                       | 1                         | 1                           |
| Yes                                                                      | 1.41 (1.18 to 1.69) ***   | 1.18 (0.97 to 1.44)         |
| <b>Personal income loss</b>                                              |                           |                             |
| No                                                                       | 1                         | 1                           |
| Yes                                                                      | 1.29 (1.12 to 1.49) ***   | 1.20 (1.05 to 1.37) **      |
| <b>Living together with a steady partner</b>                             |                           |                             |
| No, s/he stay elsewhere                                                  | 1                         | 1                           |
| Yes, the whole time/part of the time                                     | 1.19 (0.83 to 1.72)       | 1.56 (1.09 to 2.23) *       |
| <b>Mental health compared with three months before COVID-19 measures</b> |                           |                             |
| <b>Frequency of getting angry</b>                                        |                           |                             |
| Same or less                                                             | 1                         | 1                           |
| More                                                                     | 1.31 (1.18 to 1.44) ***   | 0.96 (0.86 to 1.07)         |
| <b>Frequency of feeling frustrated</b>                                   |                           |                             |
| Same or less                                                             | 1                         | 1                           |
| More                                                                     | 1.20 (1.03 to 1.41) *     | 1.00 (0.85 to 1.19)         |
| <b>Frequency of feeling bored</b>                                        |                           |                             |
| Same or less                                                             | 1                         | 1                           |
| More                                                                     | 1.09 (0.99 to 1.19)       | 1.11 (0.88 to 1.41)         |
| <b>Frequency of worrying about finances</b>                              |                           |                             |
| Same or less                                                             | 1                         | 1                           |
| More                                                                     | 1.43 (1.16 to 1.75) ***   | 1.21 (0.98 to 1.48)         |

Note: Nigeria and Uganda are also low- or low-middle-income countries.

† Single: including no partner, widowed, divorced, other.

AOR: Adjusted odd ratios. 95% confidence intervals in brackets.

\*  $p < 0.05$ , \*\*  $p < 0.01$ , \*\*\*  $p < 0.001$ .
