# Supplementary material
Source: HighWire-hosted journal article supplement (https://srh.bmj.com/content/50/2/83)
Supplement: inline-supplementary-material-7 [file inline-supplementary-material-7.pdf]

Supplementary table 7 The multinomial probit regression analysis of pandemic-induced exposures on fertility intentions compared with not changed, stratified by country income level (n=10672)

|                                         | Fertility intentions      |                             |                                                            |                             |
|-----------------------------------------|---------------------------|-----------------------------|------------------------------------------------------------|-----------------------------|
|                                         | High-income countries     |                             | Upper-middle-income and Low or low-middle-income countries |                             |
|                                         | Postponed<br>AOR (95% CI) | Accelerated<br>AOR (95% CI) | Postponed<br>AOR (95% CI)                                  | Accelerated<br>AOR (95% CI) |
| <b>Age (years)</b>                      | 1.55 (1.24 to 1.94) ***   | 1.28 (1.11 to 1.47) ***     | 1.49 (1.27 to 1.75) ***                                    | 1.66 (1.31 to 2.11) ***     |
| <b>Age<sup>2</sup> (years)</b>          | 0.99 (0.99 to 1.00) ***   | 1.00 (0.99 to 1.00) ***     | 0.99 (0.99 to 1.00) ***                                    | 0.99 (0.99 to 1.00) ***     |
| <b>Marital status</b>                   |                           |                             |                                                            |                             |
| Single <sup>1</sup>                     | 1                         | 1                           | 1                                                          | 1                           |
| Not married, have a partner             | 0.90 (0.62 to 1.32)       | 1.01 (0.65 to 1.55)         | 1.08 (0.75 to 1.55)                                        | 0.99 (0.61 to 1.63)         |
| Legally Married                         | 1.19 (0.79 to 1.80)       | 0.83 (0.49 to 1.41)         | 1.65 (1.15 to 2.37) **                                     | 2.36 (1.78 to 3.13) ***     |
| <b>Education</b>                        |                           |                             |                                                            |                             |
| No formal education-secondary education | 1                         | 1                           | 1                                                          | 1                           |
| Some college/university                 | 1.11 (0.73 to 1.71)       | 1.07 (0.59 to 1.96)         | 0.82 (0.75 to 0.91) ***                                    | 0.73 (0.35 to 1.51)         |
| Completed college/university            | 1.03 (0.84 to 1.27)       | 1.35 (0.93 to 1.94)         | 0.93 (0.64 to 1.36)                                        | 0.64 (0.37 to 1.11)         |
| <b>Religion</b>                         |                           |                             |                                                            |                             |
| Has no religious belief                 | 1                         | 1                           | 1                                                          | 1                           |
| Has a religious belief                  | 1.26 (1.04 to 1.53) *     | 1.42 (1.03 to 1.95) *       | 1.59 (1.43 to 1.77) ***                                    | 2.03 (1.38 to 3.00) ***     |
| <b>Number of children</b>               |                           |                             |                                                            |                             |
| 0                                       | 1                         | 1                           | 1                                                          | 1                           |
| 1                                       | 1.43 (1.03 to 1.98) *     | 0.89 (0.67 to 1.19)         | 0.81 (0.45 to 1.47)                                        | 0.42 (0.34 to 0.53) ***     |
| >=2                                     | 0.63 (0.47 to 0.84) **    | 0.46 (0.33 to 0.66) ***     | 0.68 (0.52 to 0.89) **                                     | 0.22 (0.14 to 0.33) ***     |
| <b>Testing for COVID-19</b>             |                           |                             |                                                            |                             |
| No                                      | 1                         | 1                           | 1                                                          | 1                           |
| Yes, always negative                    | 0.87 (0.73 to 1.03)       | 1.15 (0.92 to 1.42)         | 0.65 (0.47 to 0.90) *                                      | 1.01 (0.63 to 1.62)         |

|                                                                          |                         |                         |                       |                         |
|--------------------------------------------------------------------------|-------------------------|-------------------------|-----------------------|-------------------------|
| Yes, at least positive once                                              | 1.21 (0.40 to 3.67)     | 1.48 (0.55 to 3.97)     | 0.72 (0.29 to 1.83)   | 1.34 (0.82 to 2.19)     |
| <b>Isolation/quarantine</b>                                              |                         |                         |                       |                         |
| No                                                                       | 1                       | 1                       | 1                     | 1                       |
| Yes                                                                      | 1.41 (1.12 to 1.78) **  | 1.22 (0.95 to 1.55)     | 1.38 (1.01 to 1.89) * | 1.18 (0.74 to 1.88)     |
| <b>Personal income loss</b>                                              |                         |                         |                       |                         |
| No                                                                       | 1                       | 1                       | 1                     | 1                       |
| Yes                                                                      | 1.30 (1.04 to 1.61) *   | 1.20 (1.06 to 1.36) **  | 1.11 (0.90 to 1.36)   | 1.23 (0.79 to 1.92)     |
| <b>Living together with a steady partner</b>                             |                         |                         |                       |                         |
| No, s/he stay elsewhere                                                  | 1                       | 1                       | 1                     | 1                       |
| Yes, the whole time/part of the time                                     | 1.53 (1.11 to 2.10) **  | 2.10 (1.63 to 2.69) *** | 0.91 (0.67 to 1.22)   | 0.59 (0.49 to 0.73) *** |
| <b>Mental health compared with three months before COVID-19 measures</b> |                         |                         |                       |                         |
| <b>Frequency of getting angry</b>                                        |                         |                         |                       |                         |
| Same or less                                                             | 1                       | 1                       | 1                     | 1                       |
| More                                                                     | 1.36 (1.22 to 1.52) *** | 0.92 (0.82 to 1.03)     | 1.16 (0.97 to 1.40)   | 1.35 (1.08 to 1.69) **  |
| <b>Frequency of feeling frustrated</b>                                   |                         |                         |                       |                         |
| Same or less                                                             | 1                       | 1                       | 1                     | 1                       |
| More                                                                     | 1.27 (1.06 to 1.52) **  | 1.14 (0.97 to 1.34)     | 0.99 (0.89 to 1.10)   | 0.57 (0.45 to 0.73) *** |
| <b>Frequency of feeling bored</b>                                        |                         |                         |                       |                         |
| Same or less                                                             | 1                       | 1                       | 1                     | 1                       |
| More                                                                     | 1.02 (0.90 to 1.16)     | 1.12 (0.83 to 1.51)     | 1.16 (0.97 to 1.39)   | 0.97 (0.66 to 1.43)     |
| <b>Frequency of worrying about finances</b>                              |                         |                         |                       |                         |
| Same or less                                                             | 1                       | 1                       | 1                     | 1                       |
| More                                                                     | 1.49 (1.17 to 1.89) **  | 1.27 (1.04 to 1.55) *   | 1.14 (0.99 to 1.30)   | 0.94 (0.57 to 1.54)     |

<sup>†</sup>Single: including no partner, widowed, divorced, other.

AOR: Adjusted odd ratios. 95% confidence intervals in brackets.

\* p < 0.05, \*\* p < 0.01, \*\*\* p < 0.001.
