# Supplementary material
Source: HighWire-hosted journal article supplement (https://srh.bmj.com/content/50/2/83)
Supplement: inline-supplementary-material-8 [file inline-supplementary-material-8.pdf]

Supplementary table 8 The multinomial probit regression analysis of pandemic-induced exposures on fertility intentions compared with not changed, examining the effects of country income level (n=10672)

|                                                                     | Fertility intentions    |                         |
|---------------------------------------------------------------------|-------------------------|-------------------------|
|                                                                     | Postponed               | Accelerated             |
|                                                                     | AOR (95% CI)            | AOR (95% CI)            |
| <b>Age (years)</b>                                                  | 1.52 (1.30 to 1.77) *** | 1.33 (1.18 to 1.51) *** |
| <b>Age<sup>2</sup> (years)</b>                                      | 0.99 (0.99 to 1.00) *** | 1.00 (0.99 to 1.00) *** |
| <b>Marital status</b>                                               |                         |                         |
| Single <sup>i</sup>                                                 | 1                       | 1                       |
| Not married to have a partner                                       | 0.96 (0.74 to 1.26)     | 1.03 (0.75 to 1.42)     |
| Legally Married                                                     | 1.31 (0.97 to 1.76)     | 0.98 (0.70 to 1.39)     |
| <b>Education</b>                                                    |                         |                         |
| No formal education-secondary education                             | 1                       | 1                       |
| Some college/university                                             | 1.03 (0.78 to 1.35)     | 1.05 (0.62 to 1.76)     |
| Completed college/university                                        | 1.03 (0.86 to 1.25)     | 1.25 (0.86 to 1.83)     |
| <b>Religion</b>                                                     |                         |                         |
| Has no religious belief                                             | 1                       | 1                       |
| Has a religious belief                                              | 1.31 (1.13 to 1.53) *** | 1.50 (1.13 to 1.99) **  |
| <b>Number of children</b>                                           |                         |                         |
| 0                                                                   | 1                       | 1                       |
| 1                                                                   | 1.23 (0.85 to 1.78)     | 0.75 (0.58 to 0.98) *   |
| >=2                                                                 | 0.65 (0.53 to 0.81) *** | 0.39 (0.29 to 0.52) *** |
| <b>Country income level</b>                                         |                         |                         |
| Upper-middle-income and Low or low-middle-income countries          | 1                       | 1                       |
| High-income countries                                               | 0.27 (0.19 to 0.37) *** | 0.32 (0.19 to 0.53) *** |
| <b>Testing for COVID-19</b>                                         |                         |                         |
| No                                                                  | 1                       | 1                       |
| Yes, always negative                                                | 0.65 (0.48 to 0.89) **  | 1.05 (0.73 to 1.53)     |
| Yes, at least positive once                                         | 0.74 (0.31 to 1.74)     | 1.30 (0.71 to 2.39)     |
| <b>Testing for COVID-19 X Country income level</b>                  |                         |                         |
| No                                                                  | 1                       | 1                       |
| Yes, always negative                                                | 1.34 (0.96 to 1.89)     | 1.08 (0.70 to 1.66)     |
| Yes, at least positive once                                         | 1.67 (0.41 to 6.79)     | 1.16 (0.36 to 3.72)     |
| <b>Isolation/quarantine</b>                                         |                         |                         |
| No                                                                  | 1                       | 1                       |
| Yes                                                                 | 1.36 (0.99 to 1.87)     | 1.13 (0.74 to 1.72)     |
| <b>Isolation/quarantine X Country income level</b>                  |                         |                         |
| No                                                                  | 1                       | 1                       |
| Yes                                                                 | 1.04 (0.71 to 1.52)     | 1.09 (0.67 to 1.76)     |
| <b>Personal income loss</b>                                         |                         |                         |
| No                                                                  | 1                       | 1                       |
| Yes                                                                 | 1.09 (0.92 to 1.29)     | 1.15 (0.80 to 1.66)     |
| <b>Personal income loss X Country income level</b>                  |                         |                         |
| No                                                                  | 1                       | 1                       |
| Yes                                                                 | 1.20 (0.92 to 1.55)     | 1.05 (0.71 to 1.54)     |
| <b>Living together with a steady partner</b>                        |                         |                         |
| No, s/he stay elsewhere                                             | 1                       | 1                       |
| Yes, the whole time/part of the time                                | 0.90 (0.75 to 1.08)     | 1.01 (0.63 to 1.63)     |
| <b>Living together with a steady partner X Country income level</b> |                         |                         |

|                                                                          |                        |                         |
|--------------------------------------------------------------------------|------------------------|-------------------------|
| No, s/he stay elsewhere                                                  | 1                      | 1                       |
| Yes, the whole time/part of the time                                     | 1.70 (1.21 to 2.38) ** | 1.93 (1.17 to 3.17) **  |
| <b>Mental health compared with three months before COVID-19 measures</b> |                        |                         |
| <b>Frequency of getting angry</b>                                        |                        |                         |
| Same or less                                                             | 1                      | 1                       |
| More                                                                     | 1.16 (0.96 to 1.41)    | 1.26 (1.04 to 1.51) *   |
| <b>Frequency of getting angry X Country income level</b>                 |                        |                         |
| Same or less                                                             | 1                      | 1                       |
| More                                                                     | 1.17 (0.93 to 1.47)    | 0.74 (0.60 to 0.92) **  |
| <b>Frequency of feeling frustrated</b>                                   |                        |                         |
| Same or less                                                             | 1                      | 1                       |
| More                                                                     | 0.98 (0.88 to 1.09)    | 0.51 (0.40 to 0.66) *** |
| <b>Frequency of feeling frustrated X Country income level</b>            |                        |                         |
| Same or less                                                             | 1                      | 1                       |
| More                                                                     | 1.29 (1.05 to 1.58) *  | 2.23 (1.62 to 3.08) *** |
| <b>Frequency of feeling bored</b>                                        |                        |                         |
| Same or less                                                             | 1                      | 1                       |
| More                                                                     | 1.06 (0.97 to 1.16)    | 1.10 (0.87 to 1.40)     |
| <b>Frequency of worrying about finances</b>                              |                        |                         |
| Same or less                                                             | 1                      | 1                       |
| More                                                                     | 1.18 (0.99 to 1.41)    | 0.96 (0.60 to 1.53)     |
| <b>Frequency of worrying about finances X Country income level</b>       |                        |                         |
| Same or less                                                             | 1                      | 1                       |
| More                                                                     | 1.26 (0.95 to 1.67)    | 1.30 (0.79 to 2.14)     |

<sup>†</sup>Single: including no partner, widowed, divorced, other.

AOR: Adjusted odd ratios. 95% confidence intervals in brackets.

\* p < 0.05, \*\* p < 0.01, \*\*\* p < 0.001.
